# Supplementary material
Source: PubMed Central journal article supplement (PMC1564105)
Supplement: rspb20053058s01.pdf [file rspb20053058s01.pdf]

# ELECTRONIC APPENDIX

This is the Electronic Appendix to the article

Impact of UV-B exposure on amphibian embryos; linking species physiology and oviposition  
behavior

by

Wendy J. Palen, Craig E. Williamson, Aaron A. Clauser and Daniel E. Schindler

*Proc. R. Soc. B* (doi:10.1098/rspb.2005.3058)

Electronic appendices are refereed with the text; however, no attempt is made  
to impose a uniform editorial style on the electronic appendices.

Section 1.

Solar phototron experiments, details by species.

| Species                        | Start date | Stage <sup>1</sup> | Duration (days) | UV-B dose treatments (kJ·m <sup>-2</sup> ) | Collection area           |
|--------------------------------|------------|--------------------|-----------------|--------------------------------------------|---------------------------|
| <i>Rana cascadae</i>           | July 19    | 8-10               | 3 *             | 0 119 204 264 426                          | Olympic National Park, WA |
| <i>Pseudacris regilla</i>      | March 20   | 5-7                | 3 *             | 0 120 205 265 428                          | N. Cascade Mountains, WA  |
| <i>Ambystoma gracile</i>       | March 18   | 8-10               | 1               | 0 40 69 89 143                             | N. Cascade Mountains, WA  |
| <i>Ambystoma macrodactylum</i> | July 17    | 10-13              | 1               | 0 50 86 111 179                            | Olympic National Park, WA |

Notes: All phototron experiments were carried out at 15° C under a 12:12 photoperiod. Stage refers to the level of embryonic development at the start of the experiment. In addition to the 3-day exposure experiments reported here, preliminary one day experiments were carried out for both frog species (\*), where no mortality was observed. Subsequent experiments for all species were designed to run until near 100% mortality was observed in the most UV-B exposed treatments. For each species at each level of UV-B exposure except 0 (dark control), we had treatments with and without photoreactivating radiation (PRR), resulting in 9 treatments per experiment. Differences in total UV-B dose are the result of different configurations of stainless-steel mesh, lamp outputs, and experiment duration. For comparison, the integrated daily dose of UV-B received at Olympic National Park (WA) during the summer solstice (June 21, 2000) at 1525 m was 129.7 kJ·m<sup>-2</sup>.

<sup>1</sup> *R. cascadae* and *P. regilla* staged according to: Gosner, K.L., 1960. A simplified table for staging anuran embryos and larvae with notes on identification. *Herpetologica*. **16**, 183-190. *A. gracile* and *A. macrodactylum* staged according to: Harrison, R.G. 1969. *In* Organization and Development of the Embryo. Yale University Press. Pp. 44-66.

Section 2.

Non-linear model estimates of solar phototron experiments

| Species                        | Photorepair | $r^2$ | $LD_{50}$<br>( $\text{kJ}\cdot\text{m}^{-2}$ ) | Steepness<br>( $a$ ) |
|--------------------------------|-------------|-------|------------------------------------------------|----------------------|
| <i>Rana cascadae</i>           | + PRR       | 0.89  | 350 $\pm$ 29                                   | 8.7 $\pm$ 3.2        |
|                                | - PRR       | 0.91  | 124 $\pm$ 17                                   | 3.6 $\pm$ 2.2        |
| <i>Pseudacris regilla</i>      | + PRR       | 0.83  | 285 $\pm$ 31                                   | 6.4 $\pm$ 4.0        |
|                                | - PRR       | 0.76  | 108 $\pm$ 9                                    | 13.0 $\pm$ 0         |
| <i>Ambystoma gracile</i>       | + PRR       | 0.91  | 95 $\pm$ 8                                     | 4.2 $\pm$ 1.6        |
|                                | - PRR       | 0.90  | 2 $\pm$ 83                                     | 0.1 $\pm$ 3.1        |
| <i>Ambystoma macrodactylum</i> | + PRR       | 0.87  | 100 $\pm$ 6                                    | 7.6 $\pm$ 3.3        |
|                                | - PRR       | 0.92  | 24 $\pm$ 58                                    | 1.0 $\pm$ 3.3        |

Notes: Data are mean-corrected  $r^2$  and parameter estimates ( $\pm$ SD), lethal dose corresponding to 50% survival ( $LD_{50}$ ) and steepness ( $a$ ), of Gauss-Newton non-linear least squares model fits for treatments with (+PRR) and without (-PRR) photorepair radiation.

Section 3.

Field survey details by species.

| Species                        | Sites surveyed | Eggs/site | $K_d$ ( $m^{-1}$ ) | Depth (cm) | % eggs shaded |
|--------------------------------|----------------|-----------|--------------------|------------|---------------|
| <i>Rana cascadae</i>           | 30             | 3.8*      | -0.223             | 5.5*       | 3.7           |
| <i>Ambystoma gracile</i>       | 11             | 3.9*      | -0.168             | 34.0*      | 0             |
| <i>Ambystoma macrodactylum</i> | 21             | 478       | -0.136             | 18.2       | 51.0          |

Notes: Summary of amphibian egg surveys. Data are averages across breeding sites for the number of eggs or egg masses (\*) per site, the diffuse attenuation coefficient ( $K_d$ ,  $m^{-1}$ ), and depth (cm) of eggs.
